# Supplementary material for: Clickable PEG hydrogel microspheres as building blocks for 3D bioprinting
Source: Royal Society of Chemistry journal article supplement (doi:10.1039/c8bm01286e), 2019-01-01
Supplement: c8bm01286e1.pdf [file c8bm01286e1.pdf]

## Supplementary Information

### Clickable PEG hydrogel microspheres as building blocks for 3D bioprinting

*Shangjing Xin, David Chimene, Jay E. Garza, Akhilesh K. Gaharwar, and Daniel L. Alge\**

**Table S1.** Concentrations (mM) of each component in PEG thiol-ene (0.75:1) precursor solutions for microgel preparation.

|        | PEG5   | PEG10  | PEG20 |
|--------|--------|--------|-------|
| PEG-Nb | 18.248 | 9.542  | 4.883 |
| PEG-DT | 26.872 | 13.813 | 6.824 |
| LAP    | 2      | 2      | 2     |
| CGRGDS | 1      | 1      | 1     |

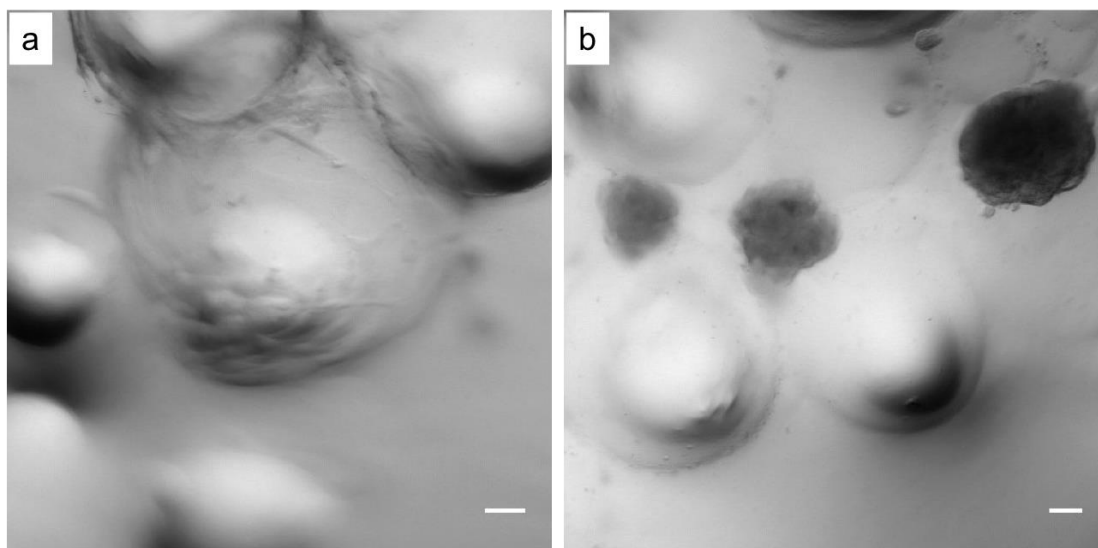

**Figure S1.** Bright field views for Figure 3a showing the positions of microgels. Scale bars are 50  $\mu\text{m}$ .

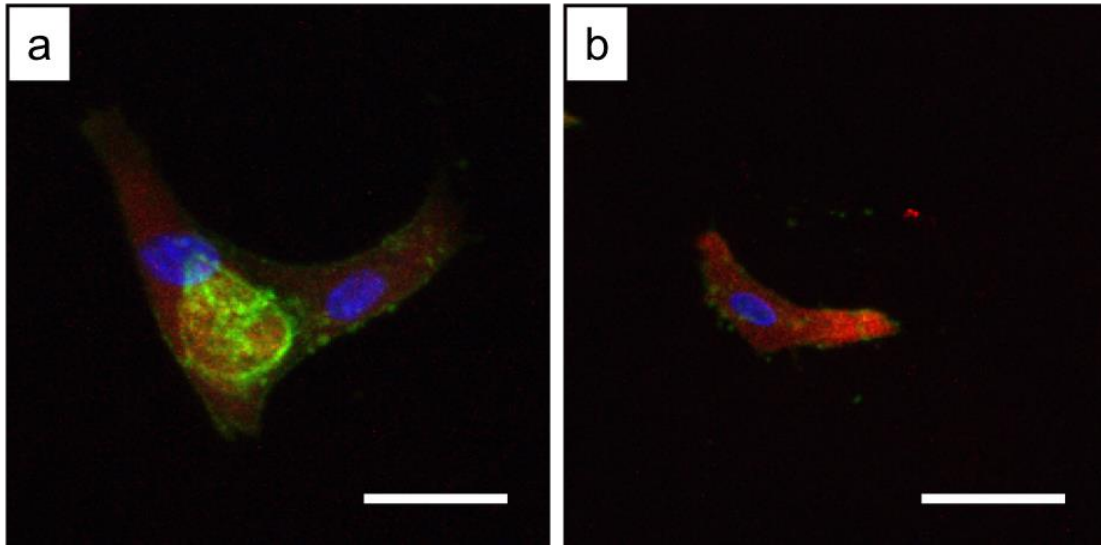

**Figure S2.** Representative 20X Z-projection images of hMSCs grown on a) PEG5 and b) PEG20 microgels. Green = vinculin, red = F-actin, and blue = nucleus. Scale bars are 50 $\mu$ m.

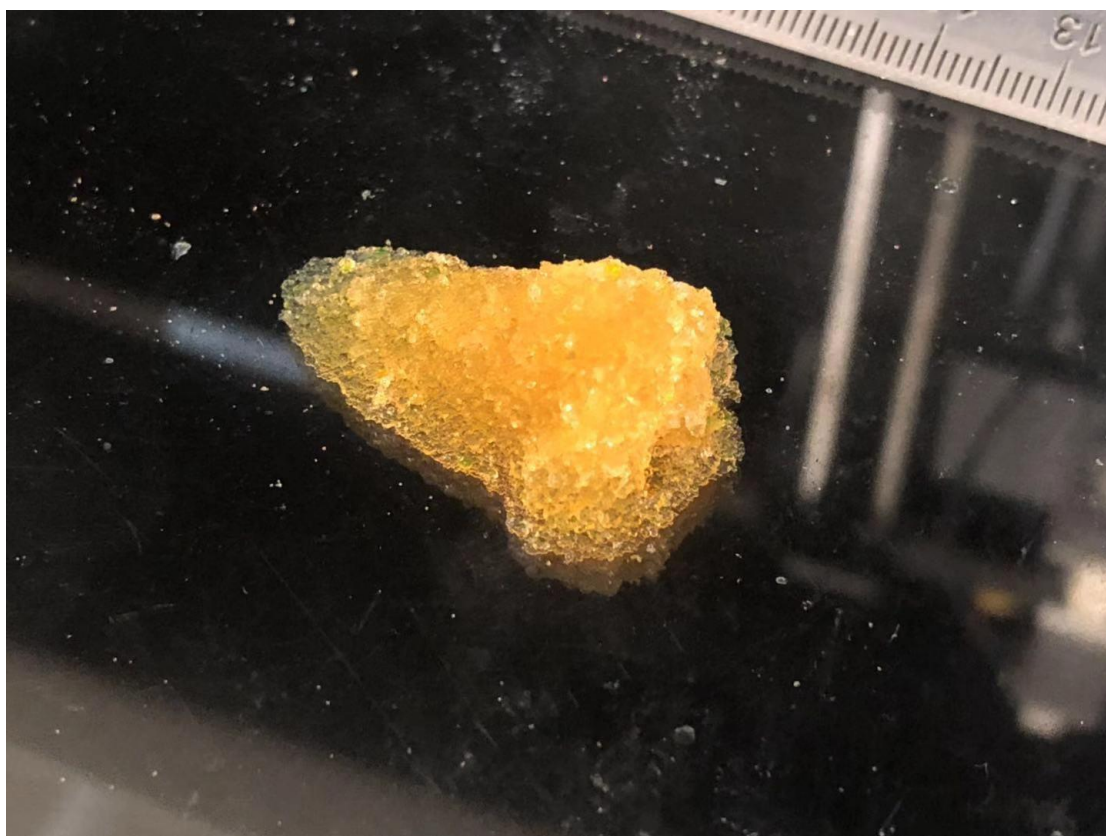

**Figure S3.** Additional image of nose print from a side view.
